# Supplementary material for: Macroautophagy deficiency mediates age-dependent neurodegeneration through a phospho-tau pathway
Source: PubMed Central journal article supplement (PMC3544596; doi:10.1186/1750-1326-7-48), 2012-09-21

# Additional File 4

**a**

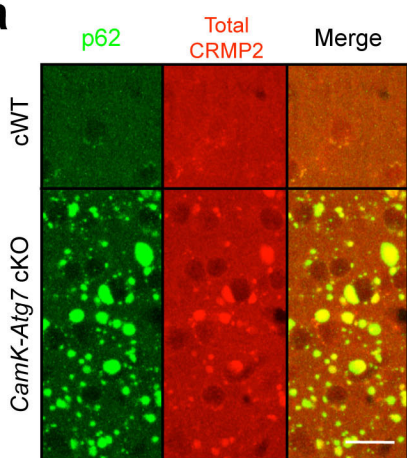

**b**

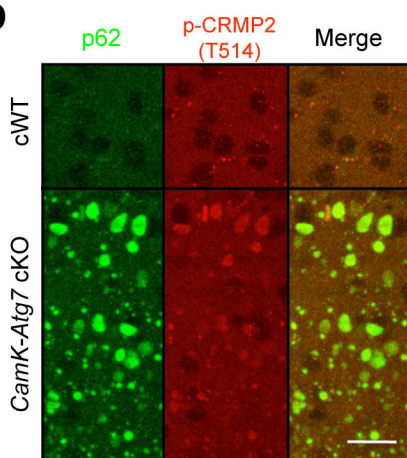

**c**

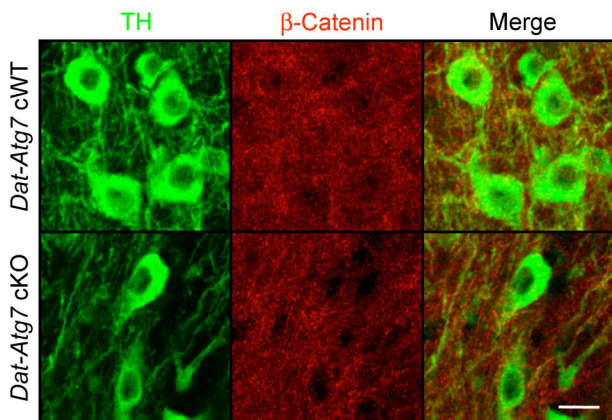

**d**

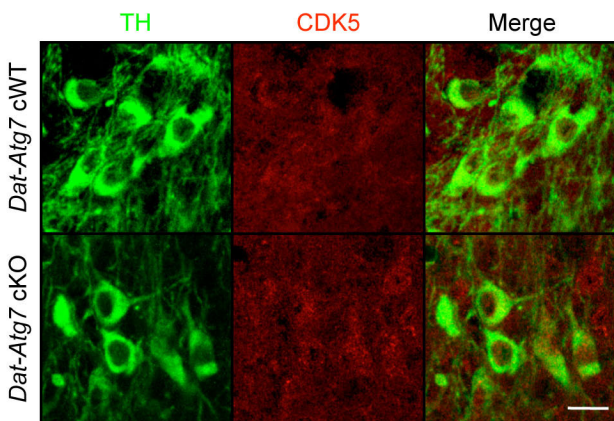

Supplement: 1750-1326-7-48-S4.pdf [file 1750-1326-7-48-S4.pdf]
